# Supplementary material for: Regulatory T cells require IL6 receptor alpha signaling to control skeletal muscle function and regeneration
Source: PubMed Central journal article supplement — Cell Metab. 2023 Oct 3;35(10):1736–1751.e7. doi: 10.1016/j.cmet.2023.08.010 (PMC10563138; doi:10.1016/j.cmet.2023.08.010), 2023-10-03
Supplement: mmc1.pdf [file mmc1.pdf]

**Cell Metabolism, Volume 35**

**Supplemental information**

**Regulatory T cells require IL6 receptor alpha  
signaling to control skeletal muscle  
function and regeneration**

**Maïke Becker, Sini S. Joseph, Francisco Garcia-Carrizo, Robby Z. Tom, Daria Opaleva, Isabelle Serr, Matthias H. Tschöp, Tim J. Schulz, Susanna M. Hofmann, and Carolin Daniel**

# **Regulatory T cells require IL-6 receptor alpha signaling to control skeletal muscle function and regeneration**

Maïke Becker<sup>1,2,10</sup>, Sini S. Joseph<sup>2,3,4,10</sup>, Francisco Garcia-Carrizo<sup>2,5,11</sup>, Robby Zachariah-Tom<sup>2,6,7,11</sup>, Daria Opaleva<sup>1,2</sup>, Isabelle Serr<sup>1,2</sup>, Matthias H. Tschöp<sup>2,3,4</sup>, Tim J. Schulz<sup>2,5,8,12</sup>, Susanna M. Hofmann<sup>2,6,7,12</sup>, and Carolin Daniel<sup>1,2,9\*</sup>

<sup>10,11,12</sup> These authors contributed equally.

\* corresponding author and lead contact

## **Supplemental Information titles and legends**

Figure S1

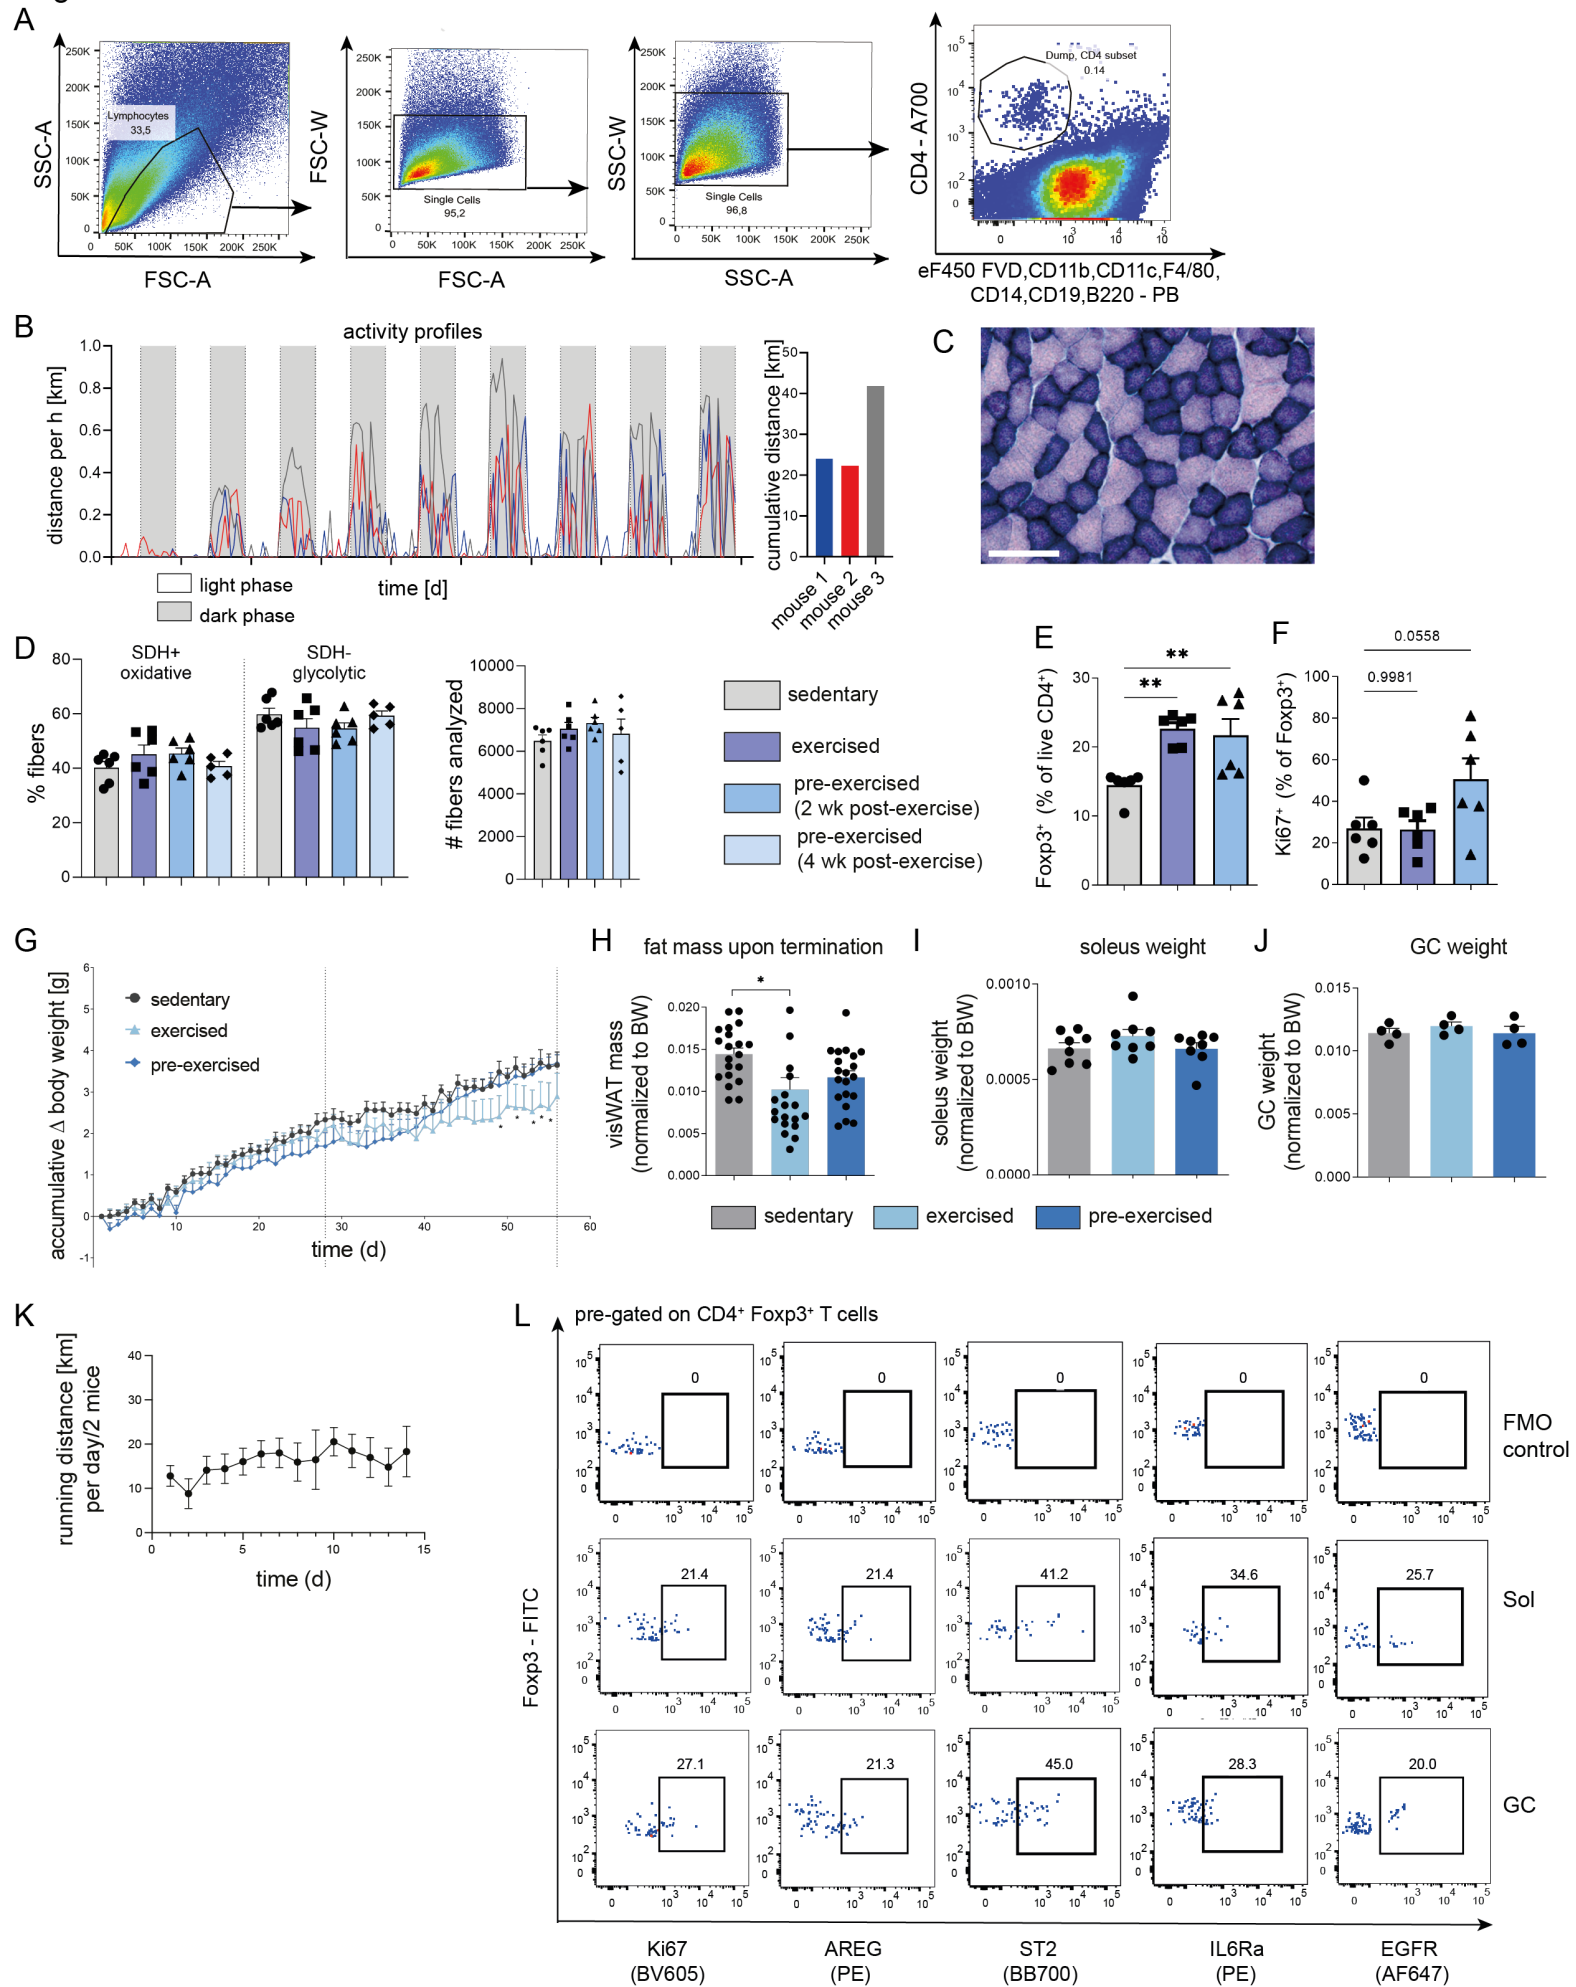

## Figure S1: Physiological parameters assessed during voluntary wheel running.

(A) Muscle-residing *ex vivo* Tregs were analyzed based on lymphocyte gating using forward and side scatter, followed by doublet exclusion based on FSC-A vs. FSC-W and SSC-A vs. SSC-W. CD4<sup>+</sup>T cells were then gated using a set of exclusion markers (CD11b, CD11c, CD14, F4/80, B220, CD8a) and dead cell stains (sytox blue or fixable viability dye eFluor450) followed by the transcription factor Foxp3 for Tregs (see Figure 1A for Foxp3 staining example).

(B) Example of activity profiles of mice subjected to voluntary wheel running using low-profile Wi-Fi wheels. Shown is the distance run per hour in the dark vs light phase over a period of 10 days and the corresponding cumulative distance.

(C-D) Representative image obtained by enzymatic staining of cryosectioned GC muscles for SDH activity and the corresponding summary graph. Medium and dark blue muscle fibers are SDH<sup>+</sup> and are referred to as being oxidative. Light blue muscle fibers are SDH<sup>-</sup> and considered being glycolytic. The scale bar (white) is 100  $\mu$ m. The groups were defined as: sedentary (eight weeks rest), exercised (four weeks rest, four weeks exercise), pre-exercised (two weeks rest, four weeks exercise, two weeks rest) and pre-exercised (four weeks exercise, four weeks rest). Each symbol refers to a biological replicate.

(E-F) Pilot study analyzing E) Foxp3<sup>+</sup> Treg and F) Ki67<sup>+</sup> proliferating Treg frequencies in Soleus of sedentary, exercised (four weeks of voluntary wheel running), and pre-exercised mice (analyzed two weeks after the four weeks voluntary wheel running period).

(G) Accumulative delta body weight of sedentary, exercised and pre-exercised WT mice (n= 14 mice per group).

(H) Visceral adipose tissue mass normalized to body weight upon termination (n= 20 mice per group).

(I-J) Weight of I) Soleus and J) Gastrocnemius normalized to body weight in sedentary, exercised and pre-exercised mice.

(K) Voluntary wheel running of WT mice represented as average running distance per day in km for two mice (from three independent experiments).

(L) Representative FACS plots showing the presence of Ki67, AREG, ST2, IL6R $\alpha$  and EGFR on muscle-residing Foxp3<sup>+</sup>Tregs (in Soleus and Gastrocnemius) and the corresponding fluorescence minus one (FMO) staining controls.

Data are represented as mean $\pm$ SEM. Each point refers to a biological replicate. Data were analyzed by one-way ANOVA followed by Tukey's or Šidák's post hoc test for multiple comparisons (D-F, H-J) or two-way ANOVA followed by Dunnett's post hoc test (G). \*p< 0.05, \*\*p< 0.01. Related to Figure 1 and 2.

Figure S2

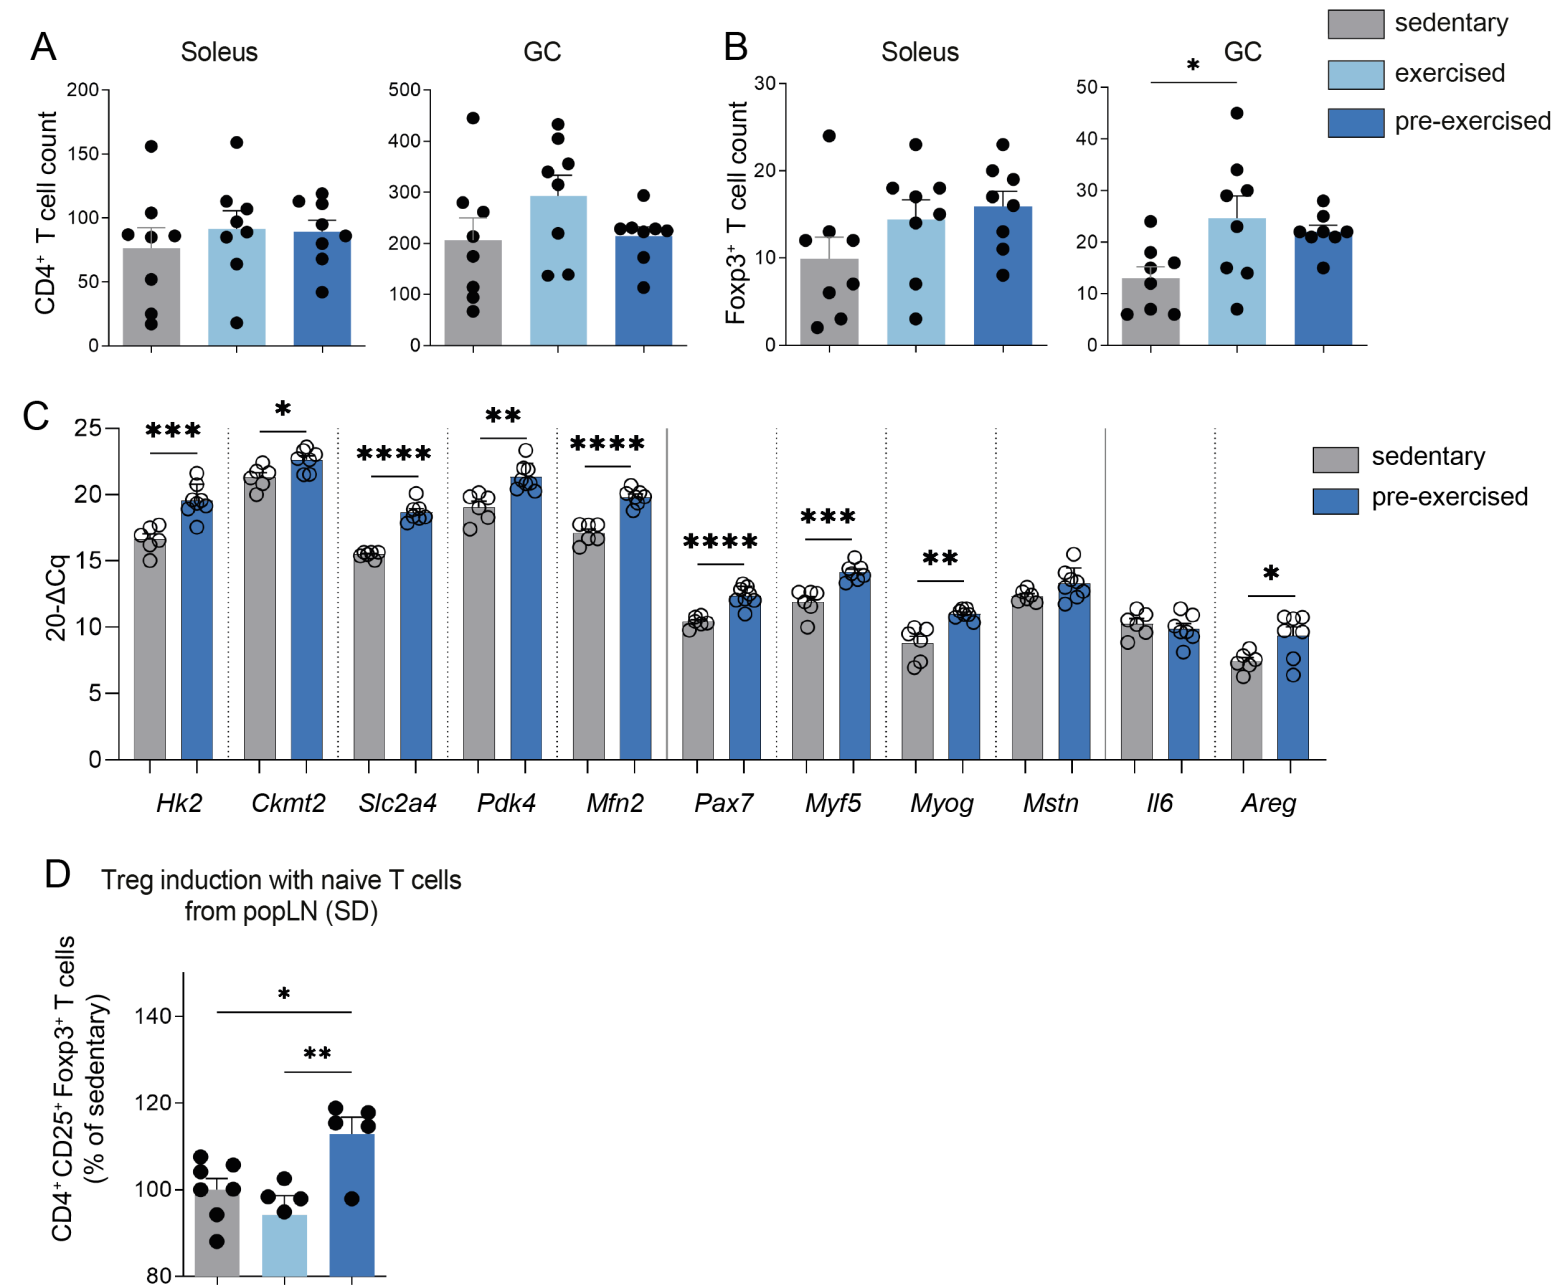

## Figure S2: Impact of exercise on muscle-residing CD4<sup>+</sup>T cells.

(A-B) A) CD4<sup>+</sup> T cell and B) Foxp3<sup>+</sup> Treg counts from Soleus and Gastrocnemius (GC) muscle per isolation.

(C) Gene expression analysis of Soleus of sedentary (n=6) and pre-exercised (n=7) WT mice. Gene expression was normalized to *Histone H3*. Data of sedentary mice as shown in Figure 1.

(D) Bar graph showing induced CD4<sup>+</sup>CD25<sup>+</sup>Foxp3<sup>+</sup> Tregs (represented as % of sedentary) from the *in vitro* Treg induction assays using limited TCR stimulation of naïve CD4<sup>+</sup>T cells sorted from popliteal lymph nodes of sedentary, exercised and pre-exercised mice. Shown are biological replicates from 2-3 independent experiments.

Data are expressed as mean±SEM. Data were analyzed by Student's unpaired two-tailed *t*-test (C) or one-way ANOVA followed by Tukey's post hoc test for multiple comparison (A, B, D) with \**p*< 0.05, \*\**p*< 0.01, \*\*\**p*< 0.001 and \*\*\*\**p*< 0.0001. Related to Figure 2.

Figure S3

A

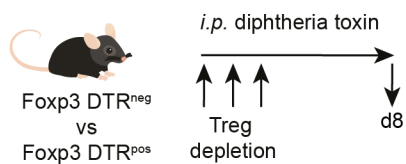

B

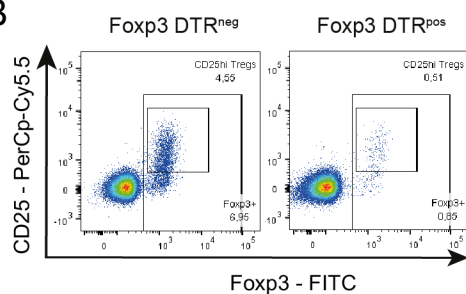

C

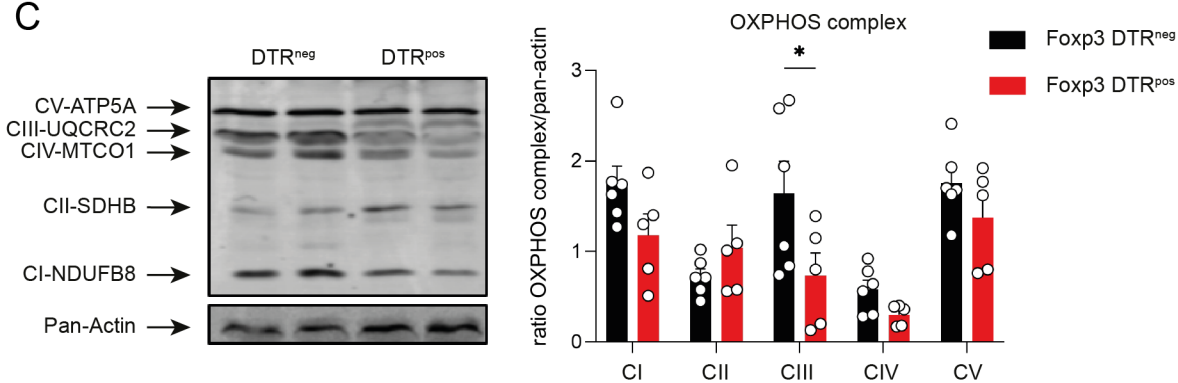

D

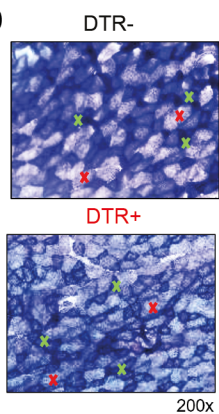

E

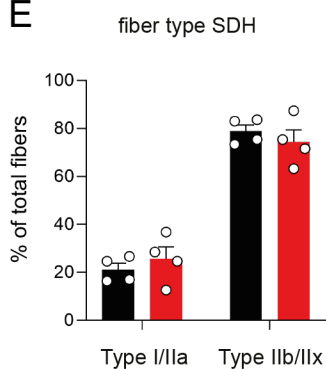

F

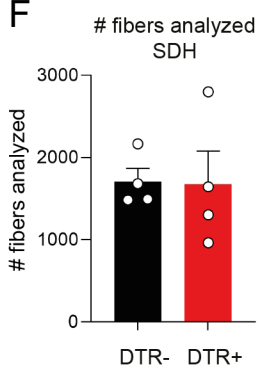

G

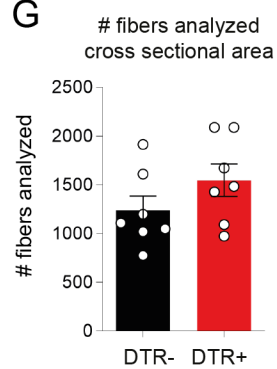

### **Figure S3: Treg depletion in Foxp3 DTR mice affects muscle homeostasis.**

(A) Experimental scheme to deplete Foxp3<sup>+</sup>Tregs using *i.p.* diphtheria toxin (DT) in Foxp3DTR mice.

(B) Representative FACS plot showing the Treg depletion efficacy in popliteal LN of Foxp3DTR<sup>-</sup> and Foxp3DTR<sup>+</sup> mice on day 8.

(C) Western Blotting results showing the analysis of OXPHOS complexes in Gastrocnemius upon Treg depletion in Foxp3DTR<sup>-</sup> and Foxp3DTR<sup>+</sup> mice. In the western blot, two biological replicates per experimental group are shown. In the summary plot analyzing CI-CV, each dot represents a biological replicate.

(D-F) Representative pictures and quantification of succinate dehydrogenase (SDH) staining of Gastrocnemius upon Treg depletion.

(G) Quantification of the cross-sectional area of Gastrocnemius fibers upon Treg depletion in Foxp3 DTR<sup>-</sup> and Foxp3 DTR<sup>+</sup> mice.

Data are represented as mean±SEM. Each dot refers to a biological replicate. Student's unpaired two-tailed *t*-test (C, E-G) with \**p*< 0.05. Related to Figure 3.



Figure S4

A

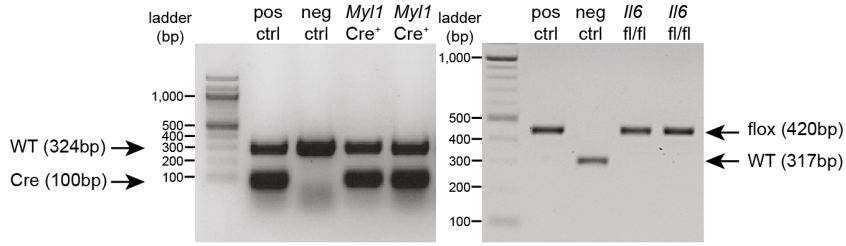

B

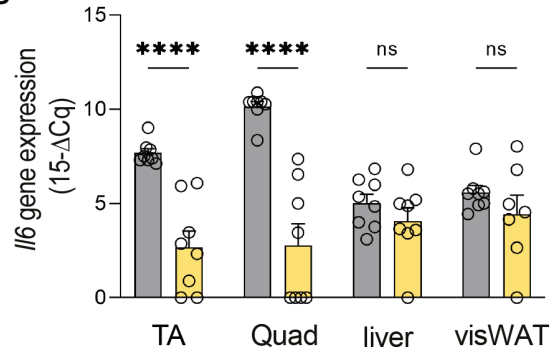

C

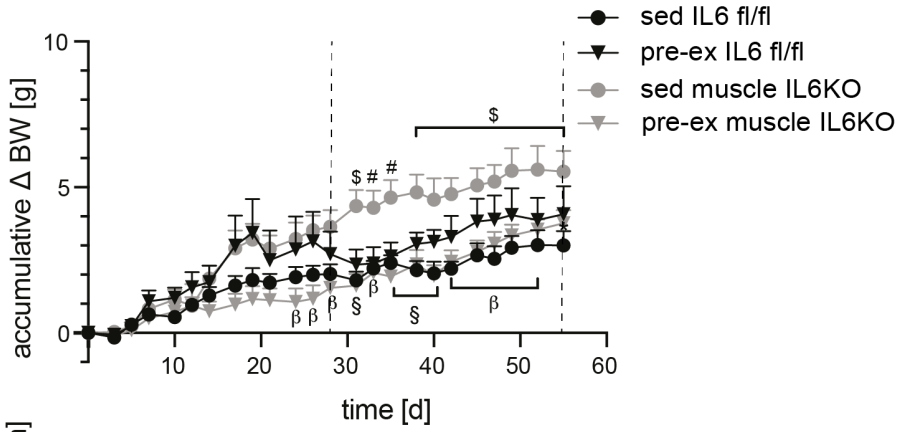

D

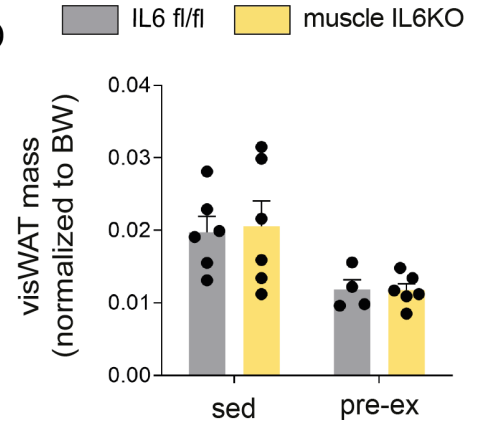

E

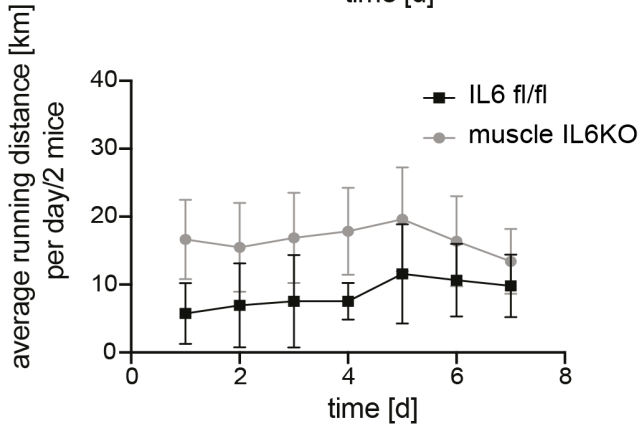

## Figure S4: Impact of exercise on muscle fiber IL6KO mice.

(A) Genotypic characterization of muscle fiber-specific IL6KO mice.

(B) Graph showing the *Il6* mRNA levels in muscles (Quadriceps, Tibialis anterior), liver and visceral adipose tissue in muscle fiber IL6KO mice and floxed controls by qPCR (n= 8 mice per group). Not detected as 0 value.

(C) Accumulative delta body weight of sedentary and pre-exercised muscle fiber IL6KO mice and floxed control mice upon standard diet (n= 6 mice per group). # (p< 0.01), \$ (p< 0.001) comparing sedentary muscle fiber IL6KO mice to sedentary floxed control mice; β (p< 0.01), § (p< 0.001) comparing sedentary muscle fiber IL6KO mice to pre-exercised muscle fiber IL6KO mice.

(D) Visceral adipose tissue mass normalized to body weight of sedentary and pre-exercised muscle fiber IL6KO mice and floxed controls.

(E) Voluntary wheel running profile of muscle fiber IL6KO mice and floxed controls represented as average running distance per day in km for two mice (from three independent experiments).

Data are expressed as mean±SEM. Each point represents a biological replicate. Data were analyzed by two-way ANOVA followed by Tukey's post hoc test for multiple comparison (C, E, D) or Student's unpaired two-tailed *t*-test (B). \*p< 0.05, \*\*p< 0.01, \*\*\*p< 0.001. Related to Figure 4.

Figure S5

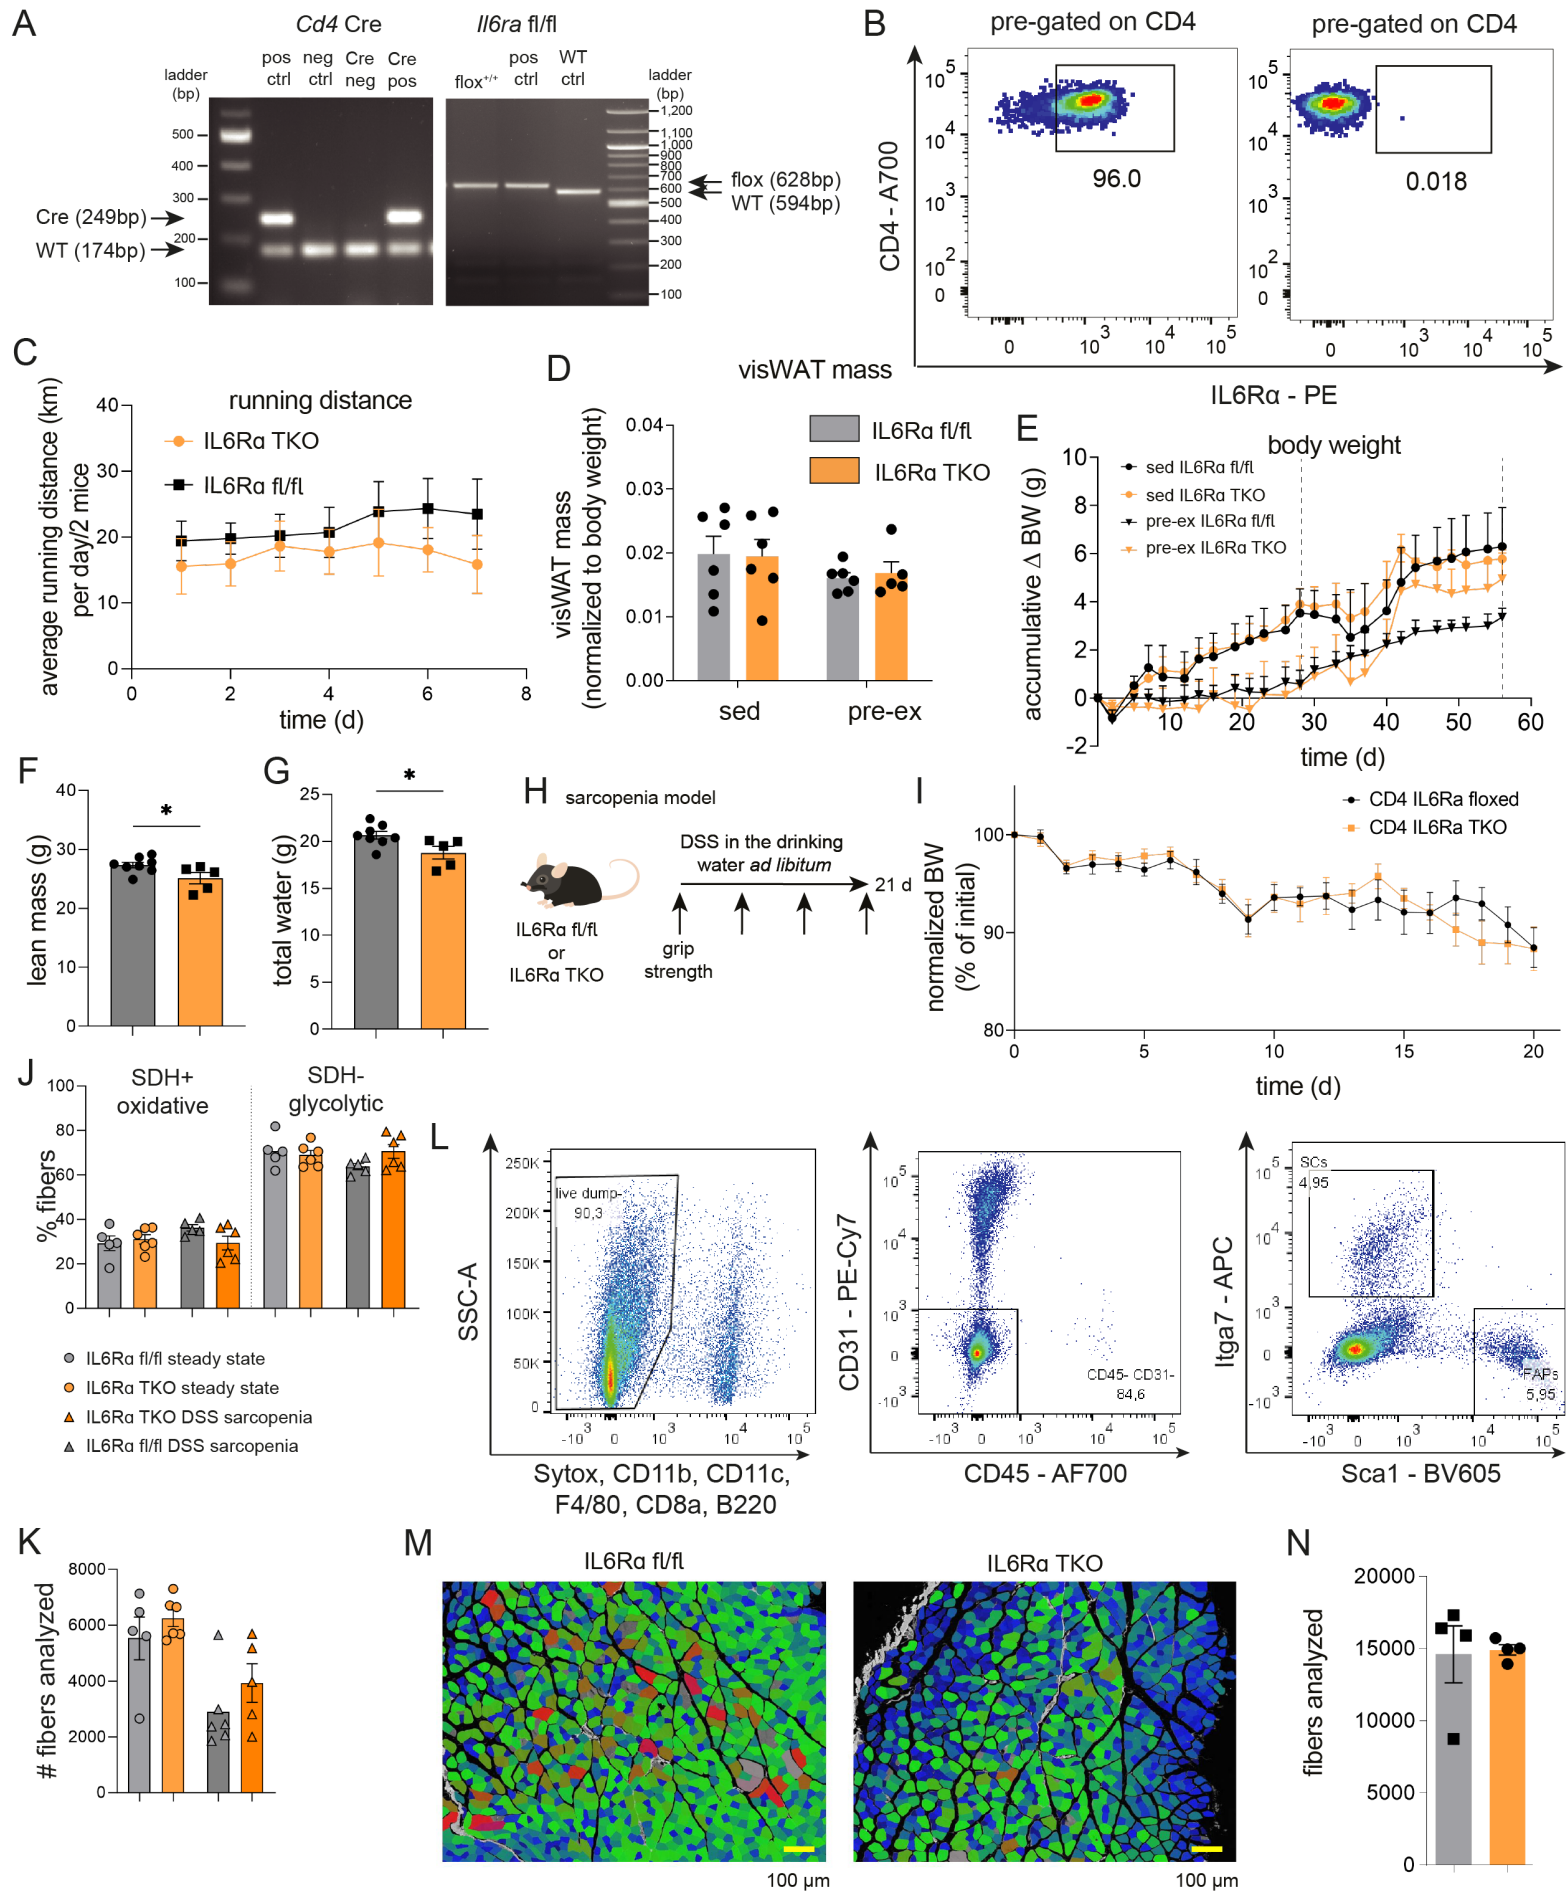

## Figure S5: Impact of exercise on mice with a T cell-specific IL6R $\alpha$ KO.

(A) Genotypic characterization of IL6R $\alpha$  TKO mice by CD4 Cre and IL6R $\alpha$  floxed PCR. PCR products were separated on a 2% agarose gel (w/v, in 1X TAE buffer) and stained using Midori Green.

(B) FACS staining of *ex vivo* IL6R $\alpha$  on CD4<sup>+</sup>T cells from inguinal lymph nodes in IL6R $\alpha$  TKO mice and floxed controls.

(C) Voluntary wheel running profile of IL6R $\alpha$  TKO mice and floxed control mice represented as average running distance per day in km for two mice (from three independent experiments).

(D) Visceral adipose tissue mass normalized to body weight of sedentary and pre-exercised IL6R $\alpha$  TKO mice and floxed controls (n= 6).

(E) Accumulative delta body weight of sedentary and pre-exercised IL6R $\alpha$  TKO mice and floxed controls fed the standard diet (n= 4-6 mice per group).

(F-G) Lean mass and total water measured by EchoMRI body composition analysis of IL6R $\alpha$  TKO mice and floxed control mice after pre-exercise.

(H) Scheme of the sarcopenia model using IL6R $\alpha$  TKO mice and floxed control mice that received DSS *ad libitum* in the drinking water. Grip strength was measured once a week.

(I) Normalized body weight change of (H) of IL6R $\alpha$  TKO mice and floxed control mice.

(J-K) Analyses of enzymatic SDH stainings in Gastrocnemius muscles of either steady state IL6R $\alpha$  fl/fl vs IL6R $\alpha$  TKO mice, or mice subjected to DSS-induced sarcopenia as of (H). not significant.

(L) Full gating scheme of the analysis of satellite cells (SCs; gated as Itga7<sup>+</sup>Sca1<sup>-</sup>CD45<sup>-</sup>CD31<sup>-</sup>dump<sup>-</sup>) and fibro-adipogenic progenitor cells (FAPs; gated as Sca1<sup>+</sup>Itga7<sup>-</sup>CD45<sup>-</sup>CD31<sup>-</sup>dump<sup>-</sup>).

(M-N) Analysis of the cross-sectional area of Gastrocnemius muscle of pre-exercised IL6R $\alpha$  TKO and floxed control mice at the end of the experiment. Scale bar (yellow) is 100  $\mu$ m.

Data are expressed as mean $\pm$ SEM. Data were analyzed by Student's unpaired two-tailed *t*-test (F, G, N), one-way ANOVA followed by Tukey's post hoc test for multiple comparison (J), or two-way ANOVA followed by Tukey's post hoc test for multiple comparison (C, E, I) with \**p* < 0.05. Related to Figure 4.

# Figure S6

## A full gating scheme - analysis 4 dpi for FAPs and SCs

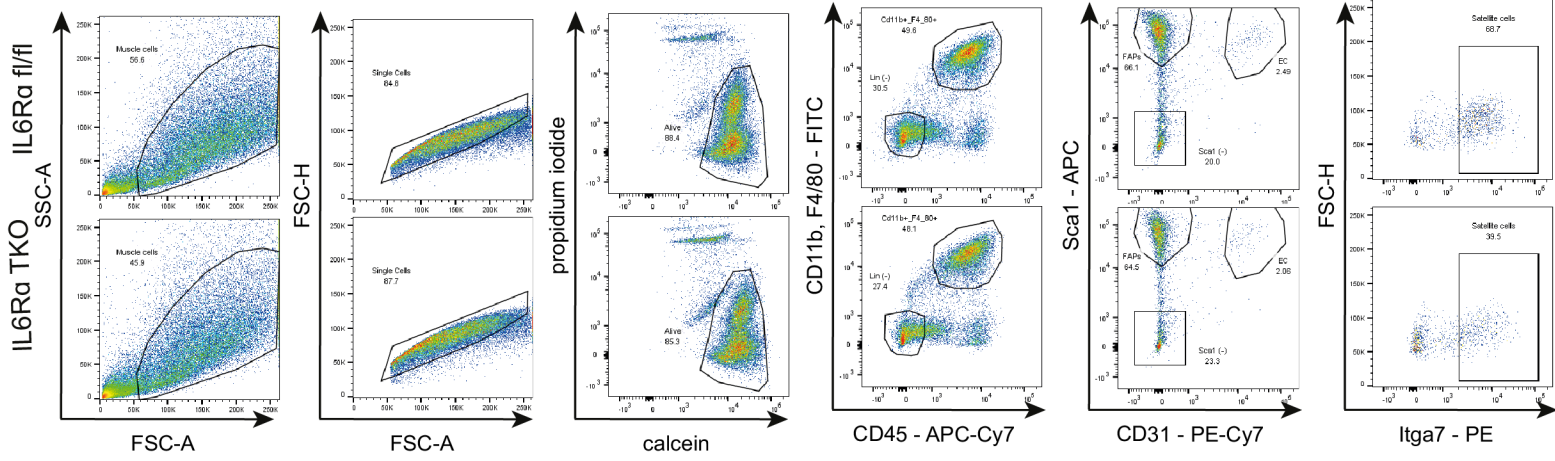

## B full gating scheme - analysis 4 dpi for macrophage polarization

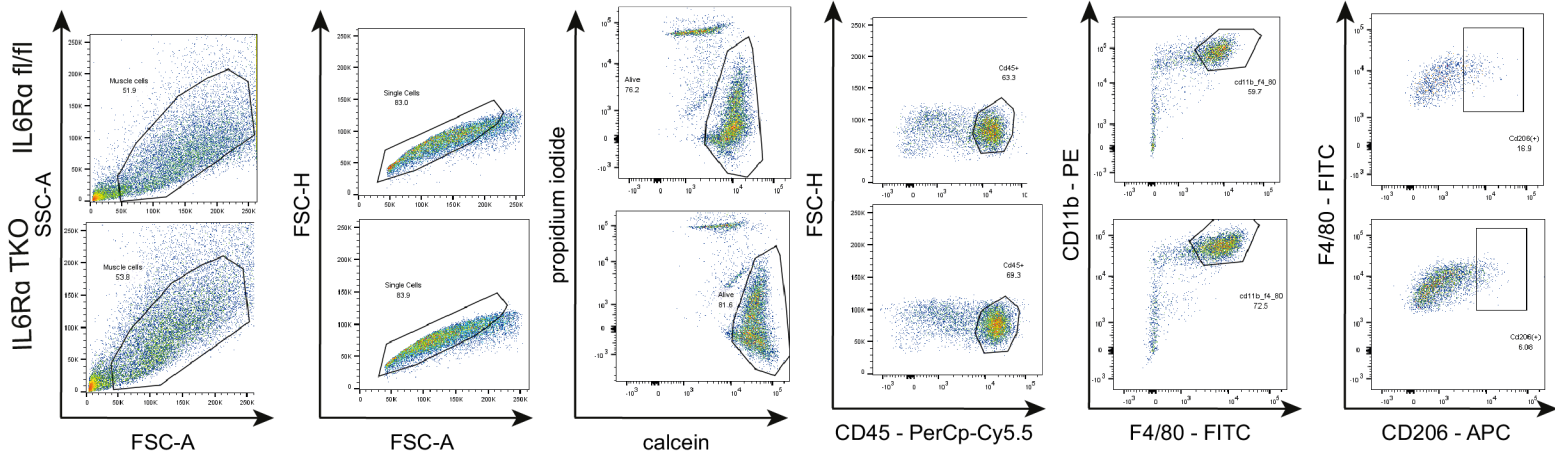

pre-gated on CD11b+ F4/80+

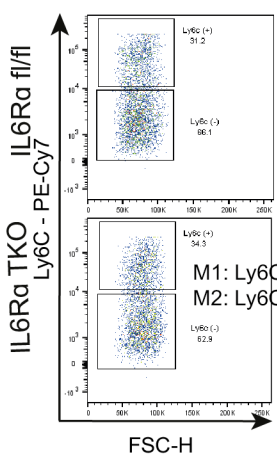

## C FACS staining controls

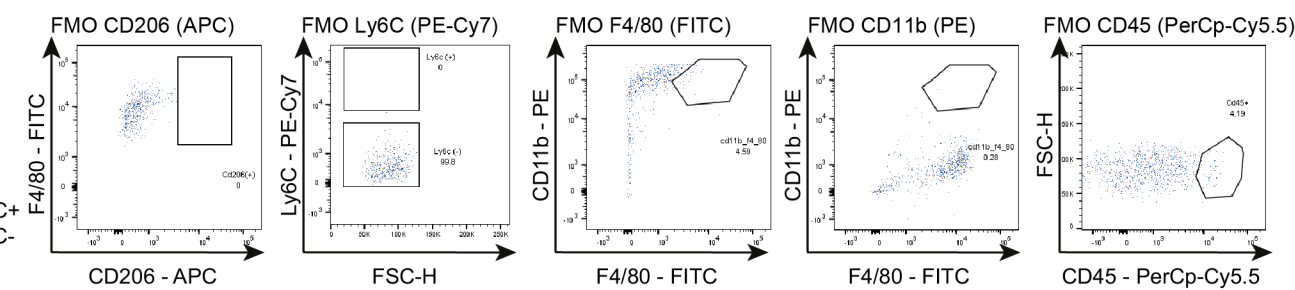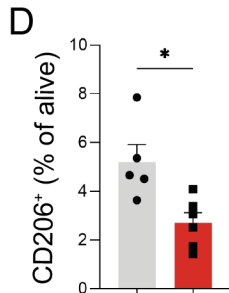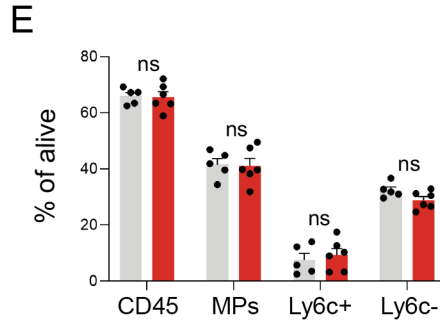

IL6Ra fl/fl  
IL6Ra TKO

**Figure S6: Muscle injury in mice with a T cell-specific IL6R $\alpha$  loss.**

(A) Full gating scheme for the analysis of endothelial cells (ECs; gated as CD45<sup>-</sup>CD11b<sup>-</sup>F4/80<sup>-</sup>Sca1<sup>+</sup>CD31<sup>+</sup>), macrophages (MPs; gated as live CD45<sup>+</sup>CD11b<sup>+</sup>F4/80<sup>+</sup>) satellite cells (SCs; gated as Itga7<sup>+</sup>Sca1<sup>-</sup>CD45<sup>-</sup>CD31<sup>-</sup>dump<sup>-</sup>) and fibro-adipogenic progenitor cells (FAPs; gated as Sca1<sup>+</sup>Itga7<sup>-</sup>CD45<sup>-</sup>CD31<sup>-</sup>dump<sup>-</sup>).

(B) Full gating scheme for the analysis of pro-inflammatory Ly6C<sup>+</sup>/anti-inflammatory Ly6C<sup>-</sup> cells or CD206<sup>+</sup> macrophages.

(C) Corresponding FACS FMO staining controls for (A-B).

(D-E) Quantification for *ex vivo* phenotypic analysis of macrophages upon muscle injury in IL6R $\alpha$  TKO and floxed control mice 4 dpi.

Data are expressed as mean $\pm$ SEM. Data were analyzed by Student's unpaired two-tailed *t*-test (D, E) with \**p*< 0.05. Related to Figure 5.

Figure S7

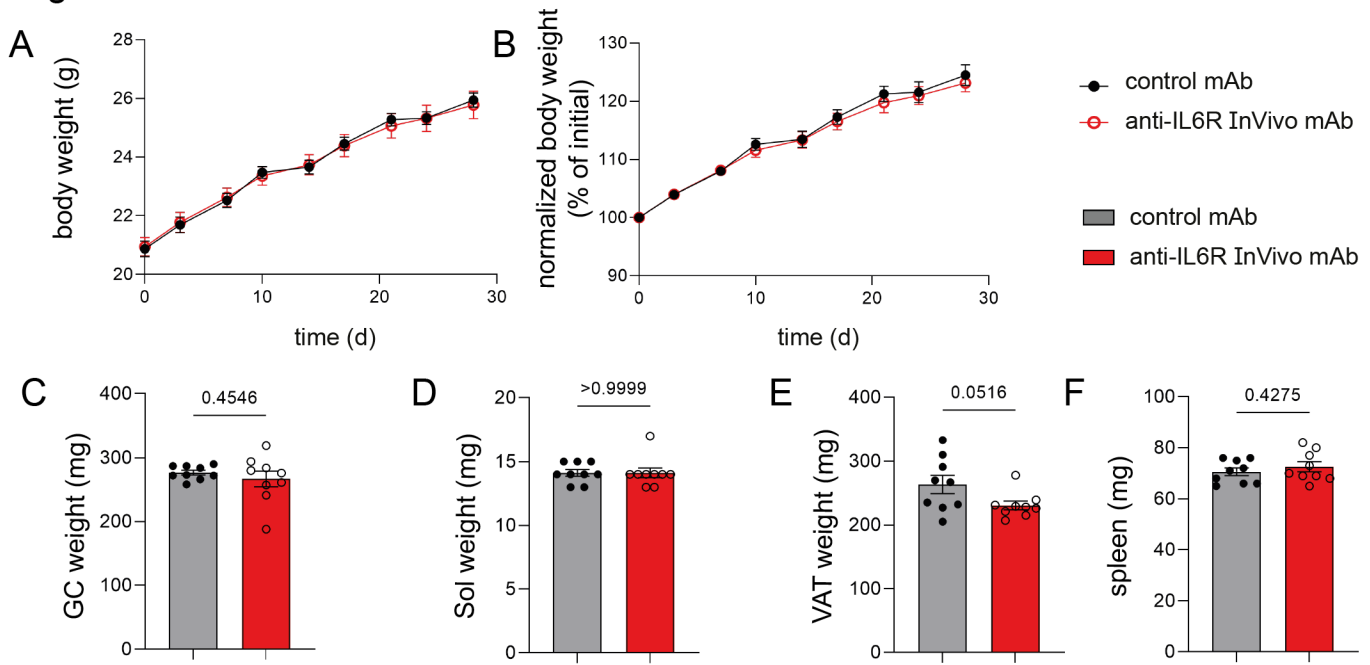

**Figure S7: Treg modulation affects muscle function.**

(A-B) Body weight change of C57Bl/6J mice treated with anti-IL6R mAb or control mAb for four weeks twice weekly. 2way ANOVA with Šidák's post hoc test. ns.

(C-F) Organ weights after four weeks of anti-IL6R mAb or control mAb treatment. Student's unpaired two-tailed *t*-test. Data represent mean±SEM. ns = not significant. Related to Figure 7.
